# Supplementary material for: Genetic susceptibility for chronic bronchitis in chronic obstructive pulmonary disease
Source: Springer Nature journal article supplement (doi:10.1186/s12931-014-0113-2), 2014-09-21

## Supplemental Materials

### Genetic Susceptibility for Chronic Bronchitis in Chronic Obstructive Pulmonary Disease

Jin Hwa Lee, Michael H. Cho, Craig P. Hersh, Merry-Lynn N. McDonald, James D. Crapo, Per S. Bakke, Amund Gulsvik, Alejandro P. Comellas, Christine H. Wendt, David A. Lomas, Victor Kim, Edwin K. Silverman, on behalf of the COPDGene and ECLIPSE Investigators

#### **e-Appendix 1. Variable definitions**

In the COPDGene study, quantitative CT measurements were performed using Slicer (Version 2, [www.slicer.org](http://www.slicer.org)). Percent emphysema was calculated as the percentage of voxels within the lung with an attenuation  $< -950$  Hounsfield units (HU) at full inspiration [% low attenuation area (LAA) $-950_{\text{insp}}$ ]. Airway analysis was performed using the Pulmonary Workstation Plus (VIDA Diagnostics, Inc., Coralville, IA). In each segmental bronchus, the wall area (WA) and lumen area (LA) were measured. The segmental wall area % was defined as  $100 \times \text{WA} / (\text{WA} + \text{LA})$ . The square roots of the wall area for hypothetical airways with an internal perimeter of 10 mm (Pi10) and 15 mm (Pi15) were used as measures of airway disease. Total lung capacity (TLC<sub>CT</sub>) in liters was calculated from volumetric CT measurements at full inspiration. Gas trapping was quantified as the percentage of lung volume on expiratory CT with an attenuation  $< -856$  HU (%LAA $-856_{\text{exp}}$ ).

#### **e-Appendix 2. Additional analysis methods**

We used permutation testing to assess differences in odds ratios (ORs) of previous known genome-wide significant SNPs between two meta-analyses for COPD subjects with CB and those without CB. For each cohort, we randomly reassigned the phenotypes (COPD with CB or without CB) of each individual to another individual in the dataset. Each random reassignment of the data represents one possible sampling of individuals under the null hypothesis, and this process is repeated a predefined number of times  $N$  to generate an empirical distribution with resolution  $N$ . Logistic regression was performed and the results were combined using meta-analysis. We repeated this procedure 10,000 times to obtain the null distribution of differences of effect sizes. Our baseline difference of effect size for each SNP was compared the permutation results, which was described by the null distribution to obtain a  $P$  value.

**e-Table 1.** Top results of the meta-analysis for COPD subjects with chronic bronchitis *versus* COPD subjects without chronic bronchitis in COPDGene non-Hispanic white and GenKOLS cohorts\*

| Locus | Nearest gene | SNP         | Risk Allele | FRQ  | COPDGene NHWs                 |                       | GenKOLS                       |                       | Overall          |                       | $I^2$ | $Q$  |
|-------|--------------|-------------|-------------|------|-------------------------------|-----------------------|-------------------------------|-----------------------|------------------|-----------------------|-------|------|
|       |              |             |             |      | OR (95% CI)                   | $P$                   | OR (95% CI)                   | $P$                   | OR (95% CI)      | $P$                   |       |      |
| 2p25  | <i>CYS1</i>  | rs12692398  | A           | 0.20 | 1.53 <sup>†</sup> (1.32-1.77) | 1.57×10 <sup>-8</sup> | 1.17 <sup>†</sup> (0.90-1.54) | 2.42×10 <sup>-1</sup> | 1.44 (1.26-1.64) | 3.33×10 <sup>-8</sup> | 65    | 0.09 |
| 2p25  | <i>CYS1</i>  | rs34900318  | A           | 0.16 | 1.55 <sup>†</sup> (1.32-1.81) | 9.44×10 <sup>-8</sup> | 1.12 <sup>†</sup> (0.85-1.48) | 4.30×10 <sup>-1</sup> | 1.43 (1.24-1.64) | 5.01×10 <sup>-7</sup> | 74    | 0.05 |
| 8p23  | <i>CSMD1</i> | rs142700918 | G           | 0.93 | 1.70 <sup>†</sup> (1.31-2.20) | 5.60×10 <sup>-5</sup> | 2.14 <sup>†</sup> (1.27-3.60) | 4.06×10 <sup>-3</sup> | 1.78 (1.41-2.25) | 1.02×10 <sup>-6</sup> | 0     | 0.44 |
| 2p25  | <i>CYS1</i>  | rs4536628   | C           | 0.27 | 1.44 <sup>†</sup> (1.26-1.65) | 1.37×10 <sup>-7</sup> | 1.07 <sup>†</sup> (0.84-1.35) | 5.96×10 <sup>-1</sup> | 1.34 (1.19-1.51) | 1.35×10 <sup>-6</sup> | 79    | 0.03 |
| 2p25  | <i>CYS1</i>  | rs4257371   | A           | 0.22 | 1.45 <sup>†</sup> (1.26-1.68) | 2.34×10 <sup>-7</sup> | 1.09 <sup>†</sup> (0.85-1.39) | 5.03×10 <sup>-1</sup> | 1.35 (1.20-1.53) | 1.47×10 <sup>-6</sup> | 75    | 0.05 |

Definition of abbreviations: CI = confidence interval; FRQ = risk allele frequency; NHW = non-Hispanic white; OR = odds ratio; SNP = single nucleotide polymorphism.

\*Adjusted for age, sex, pack-years of cigarette smoking and genetic ancestry as summarized in the principal components.

<sup>†</sup>Imputed genotypes

**e-Table 2.** Baseline characteristics of COPD subjects with chronic bronchitis and smokers with normal spirometry as a control group in African Americans of COPDGene cohort.

|                                | COPDGene African Americans   |             |
|--------------------------------|------------------------------|-------------|
|                                | COPD with chronic bronchitis | Controls    |
| n                              | 182                          | 1,749       |
| Age, years                     | 57.8 (7.4)                   | 52.8 (6.0)  |
| Pack-years                     | 44.2 (24.0)                  | 36.4 (20.1) |
| Current Smoker (%)             | 73.6                         | 87.4        |
| FEV <sub>1</sub> , % predicted | 52.6 (16.6)                  | 98.4 (12.2) |
| Sex (% male)                   | 59.3                         | 58.1        |

Data are presented as mean (SD) or percentage, as appropriate.

**e-Table 3.** Baseline characteristics of COPD subjects with chronic bronchitis and smoking controls without chronic bronchitis

|                                | COPDGene NHWs |                     | GenKOLS      |                     | ECLIPSE      |                     | COPDGene AAs |                     |
|--------------------------------|---------------|---------------------|--------------|---------------------|--------------|---------------------|--------------|---------------------|
|                                | COPD with CB  | Controls without CB | COPD with CB | Controls without CB | COPD with CB | Controls without CB | COPD with CB | Controls without CB |
| n                              | 844           | 2,217               | 311          | 730                 | 507          | 154                 | 182          | 1,527               |
| Age, years                     | 62.8 (8.3)    | 59.9 (8.7)          | 65.3 (10.0)  | 55.5 (9.6)          | 62.3 (7.7)   | 57.4 (9.4)          | 57.8 (7.4)   | 52.8 (6.1)          |
| Pack-years                     | 59.2 (28.6)   | 37.3 (20.1)         | 33.9 (20.2)  | 19.1 (13.0)         | 51.6 (30.2)  | 32.4 (26.3)         | 44.2 (24.0)  | 35.8 (19.5)         |
| Current smoker (%)             | 53.3          | 34.9                | 54.0         | 40.4                | 51.4         | 36.6                | 73.6         | 87.0                |
| FEV <sub>1</sub> , % predicted | 48.6 (17.4)   | 97.0 (11.0)         | 46.9 (16.8)  | 95.1 (9.3)          | 46.3 (15.3)  | 107.7 (13.6)        | 52.6 (16.6)  | 98.6 (12.2)         |
| Sex (% male)                   | 61.8          | 48.3                | 64.6         | 49.3                | 75.7         | 61.7                | 59.3         | 58.9                |

Data are presented as mean (SD) or percentage, as appropriate.

Definition of abbreviations: AA = African American; CB = chronic bronchitis; NHW = non-Hispanic white.

**e-Table 4.** Top results of the two meta-analyses for COPD subjects with chronic bronchitis *versus* smokers with normal spirometry, including current smoking adjustment\*

| Locus | Nearest gene   | SNP        | Risk Allele | FRQ  |      | COPD Gene NHWs, GenKOLS, and ECLIPSE cohorts |                        |                       |          | COPD Gene NHWs and AAs, GenKOLS, and ECLIPSE cohorts |                        |                       |          |
|-------|----------------|------------|-------------|------|------|----------------------------------------------|------------------------|-----------------------|----------|------------------------------------------------------|------------------------|-----------------------|----------|
|       |                |            |             | EUR  | AA   | OR (95% CI)                                  | <i>P</i>               | <i>I</i> <sup>2</sup> | <i>Q</i> | OR (95% CI)                                          | <i>P</i>               | <i>I</i> <sup>2</sup> | <i>Q</i> |
| 4q22  | <i>FAM13A</i>  | rs1812329  |             | 0.40 | 0.58 | 1.40 (1.26-1.56)                             | $1.91 \times 10^{-10}$ | 0                     | 0.47     | 1.35 (1.23-1.49)                                     | $4.04 \times 10^{-10}$ | 28                    | 0.25     |
| 4q22  | <i>FAM13A</i>  | rs4416442  |             | 0.40 | 0.54 | 1.40 (1.26-1.56)                             | $2.32 \times 10^{-10}$ | 0                     | 0.47     | 1.36 (1.24-1.50)                                     | $1.57 \times 10^{-10}$ | 4                     | 0.37     |
| 15q25 | <i>AGPHD1</i>  | rs9788721  |             | 0.36 | 0.37 | 1.34 (1.21-1.49)                             | $6.58 \times 10^{-8}$  | 29                    | 0.25     | 1.32 (1.20-1.45)                                     | $2.76 \times 10^{-8}$  | 12                    | 0.33     |
| 15q25 | <i>CHRNA3</i>  | rs12914385 |             | 0.42 | 0.19 | 1.31 (1.18-1.45)                             | $2.70 \times 10^{-7}$  | 36                    | 0.21     | 1.32 (1.20-1.45)                                     | $2.17 \times 10^{-8}$  | 6                     | 0.36     |
| 11p15 | <i>EFCAB4A</i> | rs34391416 |             | 0.05 | 0.01 | 1.85 (1.45-2.34)                             | $5.25 \times 10^{-7}$  | 81                    | 0.006    | 1.85 (1.46-2.34)                                     | $2.60 \times 10^{-7}$  | 71                    | 0.02     |

Definition of abbreviations: AA = African American; CI = confidence interval; EUR = European white; FRQ = risk allele frequency; NHW = non-Hispanic white; OR = odds ratio; SNP = single nucleotide polymorphism.

\*Adjusted for age, sex, current smoking, pack-years of cigarette smoking and genetic ancestry as summarized in the principal components.

**e-Table 5.** Top results of three Caucasian cohorts meta-analyses for COPD subjects with chronic bronchitis (CB) *versus* without CB, including current smoking adjustment\*

| Locus | Nearest gene            | SNP         | Risk Allele | FRQ  | COPD Gene NHWs                |                       | GenKOLS                       |                       | ECLIPSE                       |                       | Overall          |                       | $I^2$ | $Q$  |
|-------|-------------------------|-------------|-------------|------|-------------------------------|-----------------------|-------------------------------|-----------------------|-------------------------------|-----------------------|------------------|-----------------------|-------|------|
|       |                         |             |             |      | OR (95% CI)                   | $P$                   | OR (95% CI)                   | $P$                   | OR (95% CI)                   | $P$                   | OR (95% CI)      | $P$                   |       |      |
| 1q23  | <i>RPL31P11</i>         | rs114931935 | A           | 0.04 | 2.15 <sup>†</sup> (1.53-3.03) | 1.23×10 <sup>-5</sup> | 2.05 <sup>†</sup> (1.04-4.04) | 3.89×10 <sup>-2</sup> | 1.57 <sup>†</sup> (1.01-2.44) | 4.59×10 <sup>-2</sup> | 1.93 (1.50-2.48) | 3.22×10 <sup>-7</sup> | 0     | 0.53 |
| 1p22  | <i>LOC10050576</i><br>8 | rs17423694  | G           | 0.91 | 1.52 <sup>†</sup> (1.22-1.90) | 2.39×10 <sup>-4</sup> | 1.16 <sup>†</sup> (0.80-1.68) | 4.27×10 <sup>-1</sup> | 1.93 <sup>†</sup> (1.39-2.70) | 1.04×10 <sup>-4</sup> | 1.53 (1.29-1.80) | 5.35×10 <sup>-7</sup> | 51    | 0.13 |
| 1q23  | <i>RPL31P11</i>         | rs114384494 | T           | 0.04 | 2.18 <sup>†</sup> (1.53-3.10) | 1.50×10 <sup>-5</sup> | 2.12 <sup>†</sup> (1.05-4.28) | 3.59×10 <sup>-2</sup> | 1.54 <sup>†</sup> (0.97-2.45) | 6.54×10 <sup>-2</sup> | 1.95 (1.50-2.53) | 5.37×10 <sup>-7</sup> | 0     | 0.49 |
| 1q23  | <i>ATF6</i>             | rs2499856   | A           | 0.12 | 1.30 <sup>†</sup> (1.08-1.55) | 4.59×10 <sup>-3</sup> | 1.24 <sup>†</sup> (0.91-1.68) | 1.67×10 <sup>-1</sup> | 1.61 <sup>†</sup> (1.29-2.02) | 3.12×10 <sup>-5</sup> | 1.38 (1.21-1.57) | 7.34×10 <sup>-7</sup> | 28    | 0.25 |
| 1q23  | <i>ATF6</i>             | rs2298019   | A           | 0.12 | 1.28 <sup>†</sup> (1.07-1.54) | 6.93×10 <sup>-3</sup> | 1.26 <sup>†</sup> (0.93-1.70) | 1.41×10 <sup>-1</sup> | 1.62 <sup>†</sup> (1.29-2.03) | 2.92×10 <sup>-5</sup> | 1.38 (1.21-1.57) | 9.69×10 <sup>-7</sup> | 31    | 0.23 |

Definition of abbreviations: CI = confidence interval; FRQ = risk allele frequency; NHW = non-Hispanic white; OR = odds ratio; SNP = single nucleotide polymorphism.

\*Adjusted for age, sex, current smoking, pack-years of cigarette smoking and genetic ancestry as summarized in the principal components.

**e-Table 6.** Assessment of top results from COPD with CB *versus* smokers with normal spirometry within the meta-analysis for COPD subjects with CB *versus* without CB\*

| Locus | Nearest gene   | SNP         | Risk Allele | FRQ  | COPDGene                      |                       | GenKOLS                       |                       | ECLIPSE                       |                       | Overall          |                       |                       |          |
|-------|----------------|-------------|-------------|------|-------------------------------|-----------------------|-------------------------------|-----------------------|-------------------------------|-----------------------|------------------|-----------------------|-----------------------|----------|
|       |                |             |             |      | OR (95% CI)                   | <i>P</i>              | OR (95% CI)                   | <i>P</i>              | OR (95% CI)                   | <i>P</i>              | OR (95% CI)      | <i>P</i>              | <i>I</i> <sup>2</sup> | <i>Q</i> |
| 4q22  | <i>FAM13A</i>  | rs2869967   | C           | 0.41 | 1.02 (0.91-1.15)              | $7.17 \times 10^{-1}$ | 1.27 (1.03-1.55)              | $2.26 \times 10^{-2}$ | 0.95 (0.81-1.10)              | $4.75 \times 10^{-1}$ | 1.04 (0.95-1.13) | $4.14 \times 10^{-1}$ | 61                    | 0.08     |
| 4q22  | <i>FAM13A</i>  | rs2045517   | T           | 0.44 | 1.02 <sup>†</sup> (0.91-1.15) | $7.15 \times 10^{-1}$ | 1.27 <sup>†</sup> (1.03-1.55) | $2.31 \times 10^{-2}$ | 0.95 <sup>†</sup> (0.81-1.10) | $4.74 \times 10^{-1}$ | 1.04 (0.95-1.13) | $4.16 \times 10^{-1}$ | 61                    | 0.08     |
| 4q22  | <i>FAM13A</i>  | rs7671167   | T           | 0.53 | 1.08 (0.96-1.21)              | $2.20 \times 10^{-1}$ | 1.11 (0.91-1.35)              | $3.12 \times 10^{-1}$ | 0.96 (0.82-1.11)              | $5.55 \times 10^{-1}$ | 1.04 (0.96-1.14) | $3.28 \times 10^{-1}$ | 0                     | 0.38     |
| 4q22  | <i>FAM13A</i>  | rs2904259   | C           | 0.53 | 1.08 <sup>†</sup> (0.96-1.21) | $2.10 \times 10^{-1}$ | 1.11 <sup>†</sup> (0.91-1.35) | $3.12 \times 10^{-1}$ | 0.95 <sup>†</sup> (0.82-1.11) | $5.55 \times 10^{-1}$ | 1.04 (0.96-1.14) | $3.17 \times 10^{-1}$ | 0                     | 0.38     |
| 11p15 | <i>EFCAB4A</i> | rs34391416  | A           | 0.04 | 1.53 (1.18-1.97)              | $1.26 \times 10^{-3}$ | 1.27 <sup>†</sup> (0.76-2.11) | $3.63 \times 10^{-1}$ | 1.37 <sup>†</sup> (0.87-2.16) | $1.79 \times 10^{-1}$ | 1.45 (1.18-1.78) | $3.92 \times 10^{-4}$ | 0                     | 0.79     |
| 11p15 | <i>CHID1</i>   | rs147862429 | T           | 0.05 | 1.71 <sup>†</sup> (1.27-2.30) | $3.75 \times 10^{-4}$ | 1.40 <sup>†</sup> (0.79-2.49) | $2.48 \times 10^{-1}$ | 1.24 <sup>†</sup> (0.75-2.06) | $3.98 \times 10^{-1}$ | 1.55 (1.22-1.95) | $2.47 \times 10^{-4}$ | 0                     | 0.53     |
| 2q14  | <i>PCDPI</i>   | rs139257032 | T           | 0.02 | 2.05 <sup>†</sup> (1.23-3.43) | $6.22 \times 10^{-3}$ | 2.03 <sup>†</sup> (1.01-4.10) | $4.72 \times 10^{-2}$ | 1.74 <sup>†</sup> (0.83-3.64) | $1.43 \times 10^{-1}$ | 1.97 (1.37-2.82) | $2.47 \times 10^{-4}$ | 0                     | 0.93     |
| 15q26 | <i>MCTP2</i>   | rs12910412  | G           | 0.47 | 1.11 <sup>†</sup> (0.98-1.25) | $8.98 \times 10^{-2}$ | 1.26 <sup>†</sup> (1.02-1.57) | $3.39 \times 10^{-2}$ | 1.03 <sup>†</sup> (0.88-1.22) | $6.94 \times 10^{-1}$ | 1.11 (1.02-1.21) | $1.98 \times 10^{-2}$ | 5                     | 0.35     |
| 11p15 | <i>CHID1</i>   | rs139090846 | T           | 0.02 | 1.80 <sup>†</sup> (1.14-2.85) | $1.18 \times 10^{-4}$ | 1.34 <sup>†</sup> (0.47-3.81) | $5.80 \times 10^{-1}$ | 2.56 <sup>†</sup> (1.10-5.93) | $2.85 \times 10^{-2}$ | 1.86 (1.28-2.71) | $1.19 \times 10^{-3}$ | 0                     | 0.62     |
| 11p15 | <i>AP2A2</i>   | rs143705409 | G           | 0.05 | 1.71 <sup>†</sup> (1.28-2.28) | $2.71 \times 10^{-4}$ | 1.29 <sup>†</sup> (0.47-2.25) | $3.67 \times 10^{-1}$ | 1.11 <sup>†</sup> (0.71-1.75) | $6.37 \times 10^{-1}$ | 1.47 (1.18-1.84) | $6.58 \times 10^{-4}$ | 26                    | 0.26     |
| 11p15 | <i>AP2A2</i>   | rs185786041 | C           | 0.05 | 1.70 <sup>†</sup> (1.28-2.27) | $2.92 \times 10^{-4}$ | 1.26 <sup>†</sup> (0.73-2.16) | $4.01 \times 10^{-1}$ | 1.12 <sup>†</sup> (0.73-1.72) | $6.14 \times 10^{-1}$ | 1.45 (1.17-1.81) | $8.06 \times 10^{-4}$ | 30                    | 0.24     |
| 11p15 | <i>AP2A2</i>   | rs117455145 | G           | 0.05 | 1.70 <sup>†</sup> (1.28-2.27) | $2.93 \times 10^{-4}$ | 1.26 <sup>†</sup> (0.73-2.16) | $4.02 \times 10^{-1}$ | 1.11 <sup>†</sup> (0.73-1.71) | $6.22 \times 10^{-1}$ | 1.45 (1.17-1.81) | $8.35 \times 10^{-4}$ | 31                    | 0.24     |

Definition of abbreviations: CI = confidence interval; FRQ = risk allele frequency; OR = odds ratio; SNP = single nucleotide polymorphism.

\*Adjusted for age, sex, pack-years of cigarette smoking and genetic ancestry as summarized in the principal components.

<sup>†</sup>Imputed genotypes



**e-Table 7.** Clinical and radiological characteristics according to genotypes of rs34391416 among subjects with COPD and smoking controls among non-Hispanic whites of COPD Gene (N=5,339)

| Genotype                                          | GG          | AG           | AA           | P*                    |
|---------------------------------------------------|-------------|--------------|--------------|-----------------------|
| n                                                 | 4,908       | 423          | 8            |                       |
| Age, years                                        | 62.2 (8.85) | 62.6 (8.7)   | 58.2 (6.5)   | NS                    |
| Female gender, %                                  | 47.3        | 48.2         | 37.5         | NS                    |
| Pack-years of smoking                             | 47.4 (26.2) | 49.5 (27.5)  | 51.0 (31.0)  | NS                    |
| Current smoker, %                                 | 36.9        | 39.0         | 50.0         | NS                    |
| Body mass index, kg/m <sup>2</sup>                | 28.5 (5.9)  | 28.5 (6.4)   | 29.1 (7.2)   | NS                    |
| 6-min walked distance, feet                       | 1389 (403)  | 1353 (410)   | 1518 (265)   | NS                    |
| Exacerbation frequency per yr                     | 0.46 (1.01) | 0.59 (1.14)  | 1.50 (2.27)  | 0.0014                |
| Severe exacerbation, %                            | 11.7        | 13.2         | 25.0         | NS                    |
| Chronic bronchitis, %                             | 21.0        | 30.0         | 37.5         | 5.08×10 <sup>-5</sup> |
| Total lung capacity (TLC) <sub>CT</sub> , L       | 5.94 (1.36) | 6.02 (1.30)  | 6.53 (1.35)  | NS                    |
| TLC % predicted                                   | 99.1 (15.8) | 100.7 (16.0) | 105.2 (10.1) | 0.038                 |
| % emphysema                                       | 8.3 (11.0)  | 8.8 (11.3)   | 7.7 (12.8)   | NS                    |
| % emphysema upper third                           | 9.4 (14.3)  | 10.5 (15.1)  | 9.1 (15.9)   | NS                    |
| % emphysema lower third                           | 7.2 (9.4)   | 7.3 (9.1)    | 6.4 (8.4)    | NS                    |
| % emphysema upper 3rd/lower 3 <sup>rd</sup> ratio | 1.8 (8.2)   | 1.7 (3.0)    | 1.0 (0.7)    | NS                    |
| % gas trapping                                    | 26.3 (21.6) | 29.1 (21.9)  | 23.3 (20.9)  | 0.044 <sup>†</sup>    |
| Segmental wall area %                             | 61.3 (3.2)  | 61.8 (3.2)   | 62.1 (4.3)   | 0.003                 |
| Subsegmental wall area %                          | 64.3 (2.6)  | 64.8 (2.7)   | 67.0 (2.9)   | 0.027 <sup>†</sup>    |
| Pi10                                              | 3.67 (0.13) | 3.68 (0.13)  | 3.70 (0.19)  | NS <sup>†</sup>       |
| Pi15                                              | 5.14 (0.19) | 5.16 (0.19)  | 5.23 (0.36)  | 0.048 <sup>†</sup>    |
| FEV <sub>1</sub> % predicted                      | 72.4 (28.0) | 66.8 (26.8)  | 80.3 (36.8)  | 0.0004                |
| FVC % predicted                                   | 85.5 (17.5) | 83.2 (16.9)  | 92.4 (24.0)  | 0.033                 |
| FEV <sub>1</sub> /FVC                             | 0.63 (0.18) | 0.60 (0.18)  | 0.63 (0.17)  | 0.001                 |
| FEF <sub>25-75%</sub> , L/min                     | 1.61 (1.30) | 1.3 (1.2)    | 1.87 (1.59)  | 0.0002                |
| Positive bronchodilator response, %               | 23.0        | 29.6         | 25.0         | 0.009                 |

Data are presented as mean (standard deviation) or percent.

\*ANOVA except for <sup>†</sup>Kruskal-Wallis test

Bronchodilator responsiveness was considered positive if the change in FEV1 or FVC was ≥200mL and ≥ 12% predicted following administration of short-acting inhaled beta-agonist.

For 6-min walked distance, n = 5,240

For TLC<sub>CT</sub> and % emphysema, n = 5,043.

For TLC % predicted, n=5,046.

For emphysema upper third, lower third, upper 3<sup>rd</sup>/lower 3<sup>rd</sup> ratio, n=4,950.

For % gas trapping, n = 4,649. For % gas trapping except for data from the University of Iowa, n=3,759.

For segmental wall area %, n = 5,044.

For subsegmental wall area %, n = 2,049.

For Pi10 and Pi15, n = 4,923.

For bronchodilator response, n = 5,302.

**e-Table 8.** Top results of the meta-analysis for COPD cases without chronic bronchitis *versus* smokers with normal spirometry in COPDGene non-Hispanic white, GenKOLS, and ECLIPSE studies\*

| Locus | Nearest gene    | SNP         | Risk Allele | Freq | COPDGene                      |                       | GenKOLS                       |                       | ECLIPSE                       |                       | Overall          |                        | $I^2$ | $Q$  |
|-------|-----------------|-------------|-------------|------|-------------------------------|-----------------------|-------------------------------|-----------------------|-------------------------------|-----------------------|------------------|------------------------|-------|------|
|       |                 |             |             |      | OR (95% CI)                   | $P$                   | OR (95% CI)                   | $P$                   | OR (95% CI)                   | $P$                   | OR (95% CI)      | $P$                    |       |      |
| 4q22  | <i>FAM13A</i>   | rs2869966   | T           | 0.41 | 1.27 (1.16-1.40)              | $8.72 \times 10^{-7}$ | 1.29 <sup>†</sup> (1.07-1.55) | $7.64 \times 10^{-3}$ | 1.44 <sup>†</sup> (1.11-1.86) | $6.31 \times 10^{-3}$ | 1.29 (1.19-1.40) | $6.77 \times 10^{-10}$ | 0     | 0.69 |
| 4q22  | <i>FAM13A</i>   | rs7682317   | T           | 0.40 | 1.27 <sup>†</sup> (1.16-1.40) | $8.28 \times 10^{-7}$ | 1.29 <sup>†</sup> (1.07-1.55) | $7.87 \times 10^{-3}$ | 1.43 <sup>†</sup> (1.11-1.86) | $6.55 \times 10^{-3}$ | 1.29 (1.19-1.40) | $6.82 \times 10^{-10}$ | 0     | 0.70 |
| 4q31  | <i>HHIP-AS1</i> | rs138641402 | A           | 0.63 | 1.27 <sup>†</sup> (1.15-1.41) | $5.38 \times 10^{-6}$ | 1.35 <sup>†</sup> (1.10-1.65) | $3.54 \times 10^{-3}$ | 1.40 <sup>†</sup> (1.07-1.84) | $1.56 \times 10^{-2}$ | 1.30 (1.19-1.42) | $4.40 \times 10^{-9}$  | 0     | 0.75 |
| 4q31  | <i>HHIP-AS1</i> | rs1980057   | C           | 0.59 | 1.23 (1.12-1.35)              | $1.45 \times 10^{-5}$ | 1.29 <sup>†</sup> (1.08-1.55) | $5.49 \times 10^{-3}$ | 1.31 <sup>†</sup> (1.03-1.68) | $3.04 \times 10^{-2}$ | 1.25 (1.16-1.35) | $2.84 \times 10^{-8}$  | 0     | 0.83 |
| 15q25 | <i>IREB2</i>    | rs8042238   | T           | 0.64 | 1.26 <sup>†</sup> (1.15-1.39) | $3.07 \times 10^{-6}$ | 1.23 <sup>†</sup> (1.01-1.49) | $3.47 \times 10^{-2}$ | 1.28 <sup>†</sup> (0.99-1.65) | $5.96 \times 10^{-2}$ | 1.26 (1.16-1.37) | $5.09 \times 10^{-8}$  | 0     | 0.96 |
| 15q25 | <i>IREB2</i>    | rs13180     | T           | 0.64 | 1.25 (1.14-1.38)              | $5.92 \times 10^{-6}$ | 1.24 (1.03-1.50)              | $2.66 \times 10^{-2}$ | 1.27 (0.98-1.63)              | $6.78 \times 10^{-2}$ | 1.25 (1.15-1.36) | $8.25 \times 10^{-8}$  | 0     | 0.99 |

Definition of abbreviations: CI: confidence interval; Freq = risk allele frequency; OR = odds ratio; SNP = single nucleotide polymorphism.

\*Adjusted for age, sex, pack-years of cigarette smoking and genetic ancestry as summarized in the principal components.

<sup>†</sup>Imputed genotypes

**e-Figure 1.** Local association plots for significant loci for the meta-analysis of COPD subjects with chronic bronchitis (CB) *versus* COPD subjects without CB in COPDGene non-Hispanic whites and GenKOLS. The x-axis is chromosomal position, and the y-axis shows the  $-\log_{10} P$  value. The most significant SNP at each locus is labeled in purple, with other SNPs colored by degree of linkage disequilibrium ( $r^2$ ). Plots created using LocusZoom.

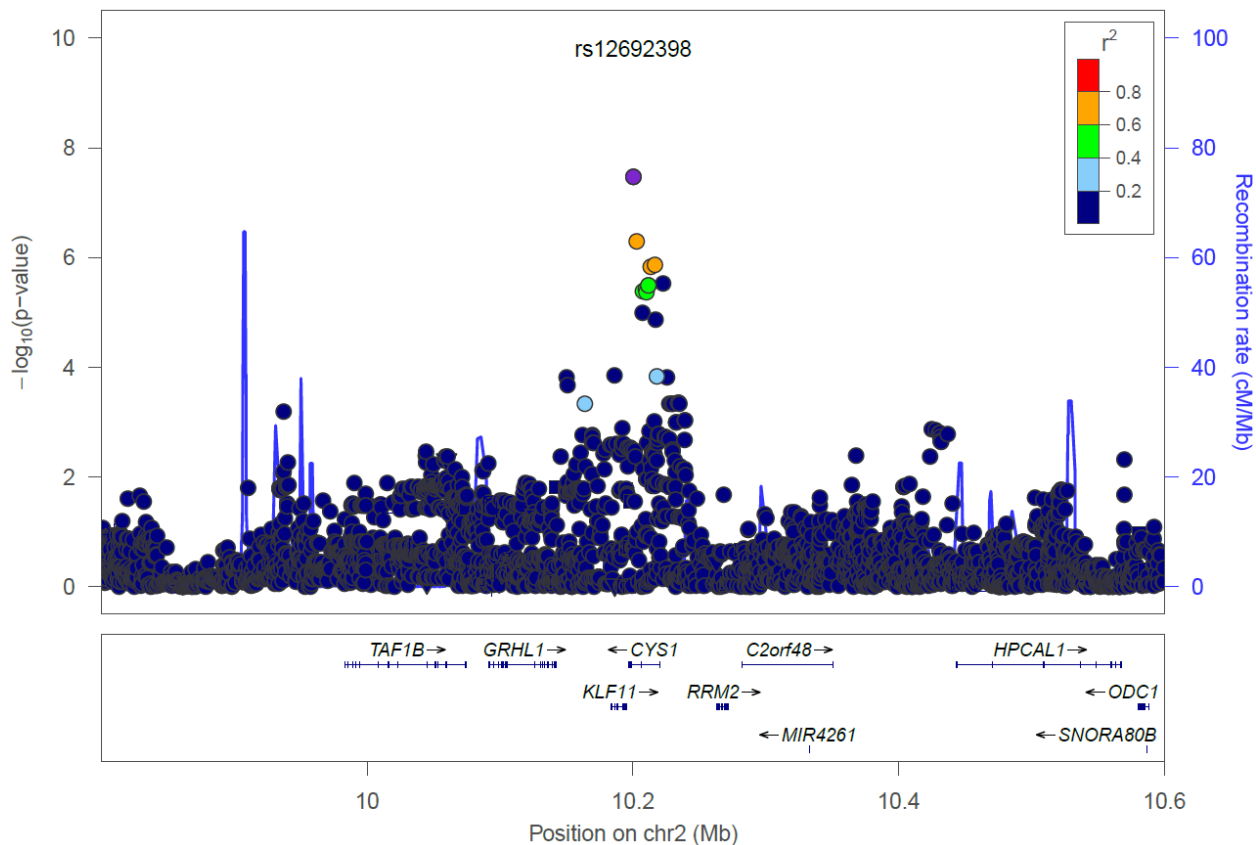

**e-Figure 2.** (A) The quantile–quantile plot and (B) Manhattan plot of  $-\log_{10} P$  values for the three-cohort meta-analysis including 1000 Genomes project imputed data for (A) COPD subjects without chronic bronchitis (CB) *versus* smoking controls after adjustment for age, sex, pack-years of cigarette smoking and genetic ancestry using principal components.

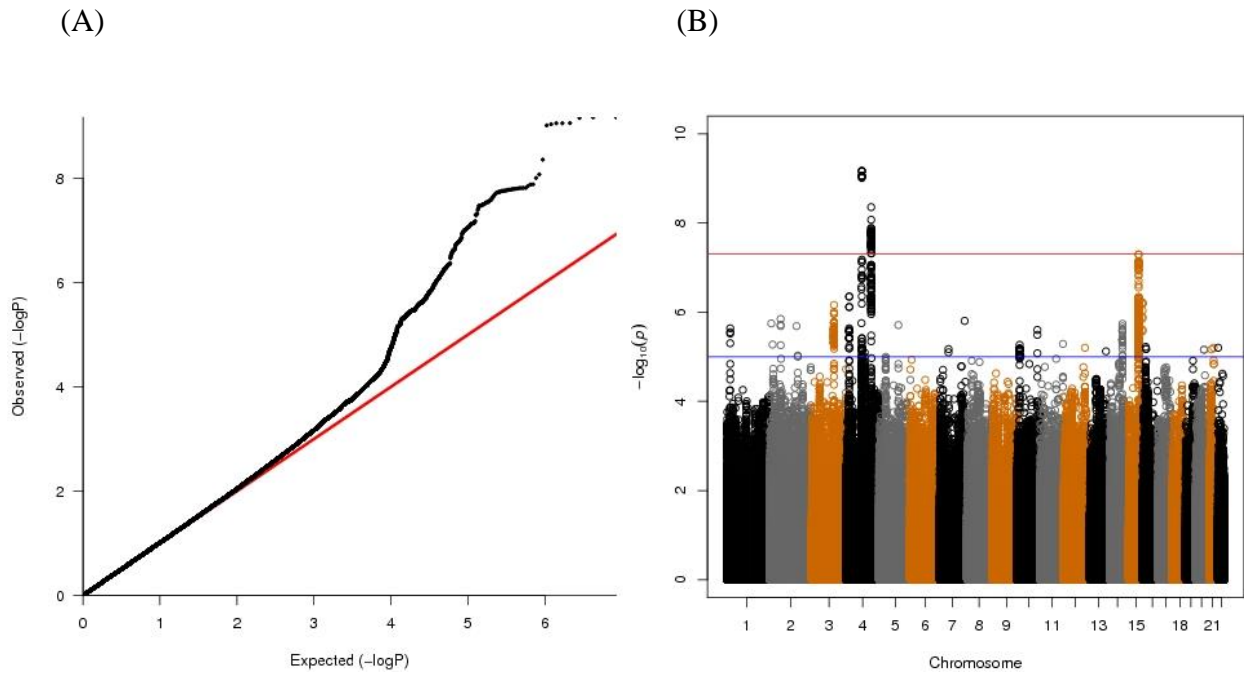

Supplement: MOESM1 [file 9759468]
